# Supplementary material
Source: publisher site journal article supplement (https://static.cambridge.org/content/id/urn:cambridge.org:id:article:S1352465820000752/resource/name/S1352465820000752supp001.docx)
Supplement: Supplementary file 1 [file S1352465820000752supp001.docx]

**Appendix A: Vignette**

*“You are the parent of Katie, a 14-year-old girl. Over the last couple of weeks, Katie has been complaining of a chronic, constant, knife-like stomach pain. She tells you that she has difficulty falling asleep because of the pain, but is able to sleep through the night. You took her to the GP last week, who examined her and carried out blood tests – all results were within the normal range. The GP said that Katie was fine and there was no sign of an illness. Katie is still experiencing the pain in her stomach.”*
